# Supplementary material
Source: publisher figshare collection journal article supplement (https://acs.figshare.com/ndownloader/files/4159966)
Supplement: Supplementary file 1 [file 4159966]

## SUPPORTING INFORMATION

# Effects of pharmaceuticals on the expression of genes involved in detoxification in a carp primary hepatocyte model.

Jenna Corcoran<sup>1\*</sup>, Anke Lange<sup>1</sup>, Matthew J. Winter<sup>2</sup>, Charles R. Tyler<sup>1\*</sup>

<sup>1</sup> University of Exeter, Biosciences, College of Life & Environmental Sciences, Exeter, UK

<sup>2</sup> AstraZeneca Safety, Health and Environment, Brixham Environmental Laboratory, Freshwater Quarry, Brixham, UK

\*Corresponding authors: Tel: +44 (0)1392 264450; Fax 44 (0)1392 263700; E-mail: C.R.Tyler@exeter.ac.uk

### This Supporting Information contains:

**Page S2** Supplemental experimental section

**Page S4** Expression of housekeeping gene *rpl8* (**Figure S1**).

**Page S5** Cell viability in control wells over culture duration (**Figure S2a**)

**Page S5** Cell viability in clotrimazole exposed wells over culture duration (**Figure S2b**)

**Page S6** Primer details (**Table S1**)

**Page S7** References

## **Supplemental experimental section**

### *Hepatocyte isolation*

The isolation of hepatocytes was performed using a two-step collagenase perfusion technique, carried out at room temperature *in situ*, using a protocol described previously [1] and in accordance with the UK Animals (Scientific Procedures) Act, 1986.

The liver was perfused via the *aerteria coeliaca* with pre-perfusion HEPES-buffered Hank's solution, containing EDTA, at a flow rate of 15 ml min<sup>-1</sup>. All solutions used in the isolation procedure based on the HEPES-buffered Hank's solution, were adjusted to pH7.5 and sterile filtered. The perfusion solution, containing 0.02% collagenase D [w/v] (Roche Diagnostics, Switzerland) was then supplied at a rate of 10 ml min<sup>-1</sup>, until the liver became soft and malleable. At this stage, the solution was changed to a post-perfusion solution, again containing EDTA, and the liver was perfused at a flow rate of 15 ml min<sup>-1</sup>. The liver was then dissected from the body cavity, placed into a Ca<sup>2+</sup> - and Mg<sup>2+</sup> -free HEPES-buffered Hanks salt solution, finely minced, and the cell suspension flushed through nylon screens (250, 100 and 55 µm). Hepatocytes were separated by low speed centrifugation (55 x g, 4 °C for 5 minutes), and the cell pellet obtained was washed twice and suspended in M199 culture medium. Initial cell viability was assessed using the trypan blue exclusion assay and only those isolates showing >90% viability were used in the subsequent analyses.

### *Primary hepatocyte culture*

Hepatocytes were counted using a haemocytometer and seeded into 24-well BD Falcon Primaria cell culture plates at a density of 1.5 x 10<sup>6</sup> cells mL<sup>-1</sup> (400 µl or 6 x 10<sup>5</sup> cells well<sup>-1</sup>) in M199 culture medium (supplemented with 3.5 mM HEPES, 4.1 mM NaHCO<sub>3</sub>, 3.4 mM CaCl<sub>2</sub>, 10% foetal bovine serum, 2mM L-glutamine, 10 U mL<sup>-1</sup> penicillin and 10 µg mL<sup>-1</sup> streptomycin). Cells were cultured in a humidified atmosphere at 20°C, and allowed to attach to

the culture plates for 24 h without exposure to chemicals. Hepatocytes were then exposed to IBU, CFA, CTZ, PRO or RIF for 72 h, at concentrations of 0.01, 1 and 100  $\mu$ M. 72 h was chosen as the culture period for study of the treated cells to allow for a sufficient period of time for any modulation of gene expression to occur in the treatment regimes, whilst also ensuring high cell viability. In a time course study hepatocytes were exposed to either RIF [10  $\mu$ M] or M199 only (controls) and sampled at dosing periods of 6, 12, 24, 36, 48, 60 and 72 h. At 24 h, and each subsequent 24h interval thereafter, 50% of the culture medium was removed and replaced with fresh medium, without FBS, containing the appropriate concentration of test chemical dissolved in DMSO (final solvent concentration 0.01%). For the inhibition studies, where cells were exposed to RIF and KET simultaneously, the appropriate concentrations, in DMSO, were added to the medium, with a final solvent concentration of 0.02%. The hepatocyte cultures in this work were prepared from 13 fish, yielding between 3 and 9 culture plates per fish. Each treatment was replicated for at least 4 separate cultures, with minimally duplicate wells for each culture treatment.

### *Primer design*

Where partial mRNA sequences were available for common carp (*gsta*, *gst $\pi$* , *mdr1* and *mrp2*), primers were designed using BeaconDesigner 3.0 software (Premier Biosoft International, Palo Alto, USA). Gene sequence data for common carp *cyp2k* and *cyp3a* were not available, and so partial sequences were first established for these genes. Briefly, the known sequence for the target gene from at least two related cyprinid species were aligned using Clustal W [2], degenerate primers designed using Primer3 software [3] and PCR performed. The PCR products were purified, sequenced (Eurofins MWG Operon) and the sequences obtained were analysed using BioEdit software [4]; carp specific primers were then designed from these sequences.

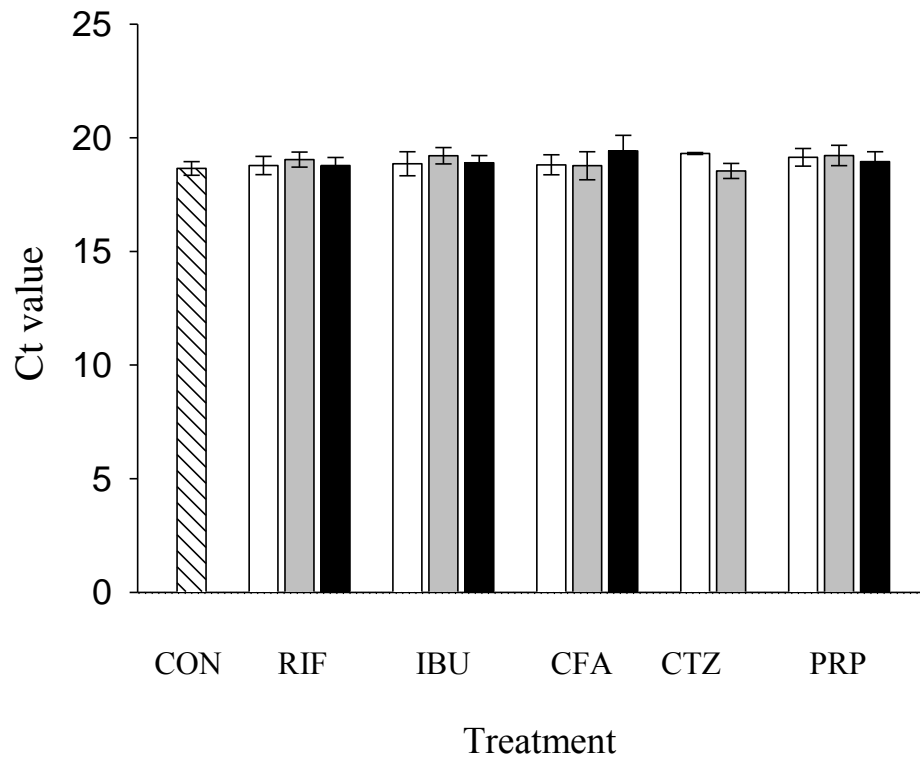

*Figure S1:* Rpl8 expression expressed as Ct value (threshold cycle) in hepatocytes exposed to pharmaceuticals (rifampicin (RIF), ibuprofen (IBU), clofibric acid (CFA), clotrimazole (CTZ) and propranolol (PRP)) at three different concentrations [0.01 μM (white bars), 1 μM (grey bars), 100 μM (black bars)] and controls (striped bar) for 72 h. There was no significant difference in Ct value between treatment groups or between cultures ( $p > 0.05$  in all cases). N = 5 cultures. Error bars represent standard error.

(a)

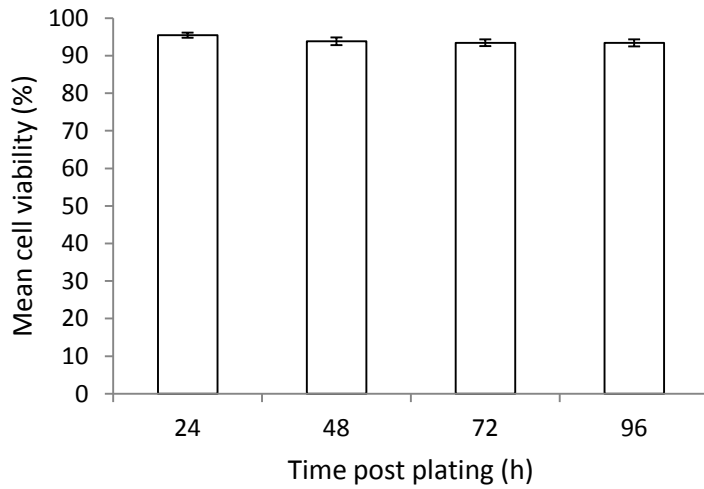

(b)

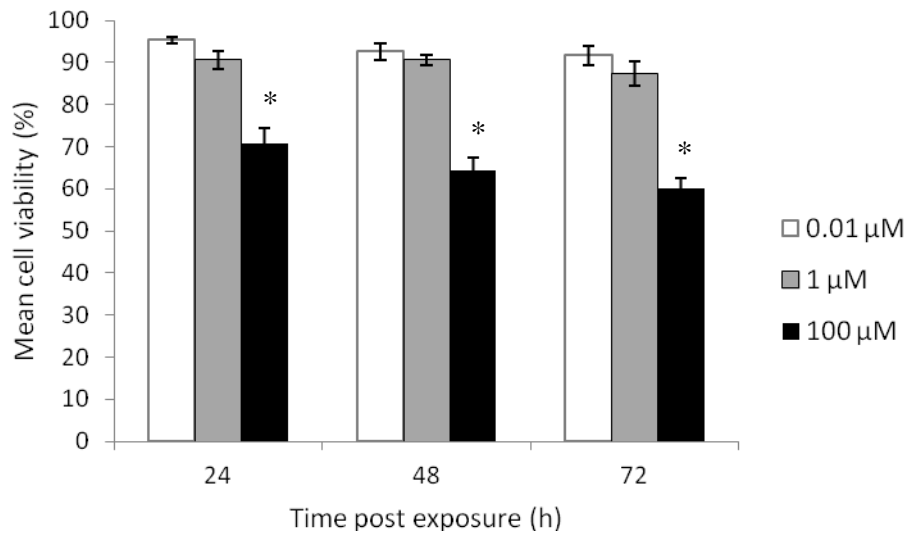

*Figure S2: cell viability over culture duration, as measured by LDH leakage into the medium in (a) control cells and (b) cells exposed to CTZ. Cell viability is expressed as percentage viability based on maximum LDH leakage being 0% viability, and no LDH leakage being 100% viability. Error bars represent standard error.  $n = 7$  for control cultures, and  $n = 4$  for each CTZ treatment. An asterisk denotes a significant difference from control ( $p < 0.05$ ).*

| Gene                               |                                 | Application                                                   | NCBI<br>accession<br>number or<br>reference | Sense primer (5'-3')                                                            | Antisense primer (5'-3')                                                   | Ta (°C)                                      | PCR<br>efficiency | Product size<br>(base pairs)                     |
|------------------------------------|---------------------------------|---------------------------------------------------------------|---------------------------------------------|---------------------------------------------------------------------------------|----------------------------------------------------------------------------|----------------------------------------------|-------------------|--------------------------------------------------|
| Cytochrome P450 2K                 | <i>cyp2k</i>                    | RT-PCR to<br>obtain<br>partial carp-<br>specific<br>sequences | N/A*                                        | F1:TTGAMMGAGTGATCGGTGGA<br>F2:TTGGAGAGAGTTTGGCCAG<br>F3:CCTCATATACAGGATCGAGTTCA | R1:CTGGCCAAACTCTCTCCAA<br>R2:TKGTGTGGCKWTGGATTYA<br>R3:TGGTAATCCATACGCCAAA | F1/R1 53<br>F1/R2 50<br>F2/R2 50<br>F3/R3 50 | N/A               | F1/R1 342<br>F1/R2 472<br>F2/R2 150<br>F3/R3 690 |
| Cytochrome P450 3A                 | <i>cyp3a</i>                    |                                                               | N/A*                                        | F1:TGCGTACAGTATGGATGTGG<br>F2:AAGAARACRGTGGASATCAA                              | R1:TTGATSTCCACYGTYTTCTT<br>R2:GGRGMCAGTAGRCCAYTGA                          | F1/R1 50<br>F1/R2 55<br>F2/R2 50             | N/A               | F1/R1 639<br>F1/R2 962<br>F2/R2 323              |
| Cytochrome P450 2K                 | <i>cyp2k</i>                    | RT-qPCR                                                       | GU19996                                     | GCTCTTCCTGTTCTTC                                                                | TGTGACTTCTACTACTC                                                          | 60.0                                         | 2.07              | 103                                              |
| Cytochrome P450 3A                 | <i>cyp3a</i>                    |                                                               | GU19997                                     | CCAAGGACCACAAGAAGAAG                                                            | AGCCGCCGAAGATGAAG                                                          | 60.0                                         | 1.921             | 159                                              |
| Glutathione-S-transferase $\alpha$ | <i>gsta</i>                     |                                                               | DQ411310                                    | TACAATACTTTTACGCTTTCCC                                                          | GGCTCAACACCTCCTTCAC                                                        | 61.5                                         | 1.979             | 149                                              |
| Glutathione-S-transferase $\pi$    | <i>gst<math>\pi</math></i>      |                                                               | DQ411313                                    | GTCCTTTGCTCTGCCTCTCTG                                                           | TTACTGCTTGCCATTGCCATTG                                                     | 60.5                                         | 2.103             | 141                                              |
| P-glycoprotein                     | <i>mdr1</i><br>( <i>abcb1</i> ) |                                                               | AY999964                                    | TTGCGGCTGTGGGAAGAG                                                              | GTGGATGTTTCAAGTTGCTTTGTG                                                   | 58.5                                         | 2.104             | 109                                              |
| Multidrug resistant protein 2      | <i>mrp2</i><br>( <i>abcc2</i> ) |                                                               | AY679169                                    | TTCGGCTCTAATCTGGATG                                                             | CTCACCCGCTGTTTCTG                                                          | 58.5                                         | 2.08              | 149                                              |
| Ribosomal protein 8                | <i>rpl8</i>                     |                                                               | See <sup>1</sup>                            | CTCCGTCTTCAAAGCCCATGT                                                           | TCCTTCACGATCCCCTTGATG                                                      | 60.0                                         | 2.14              | N/A                                              |

Table 1: Details of primers used with PCR and RT-qPCR; Ta is annealing temperature; PCR efficiency represents the 'E' value. \* Degenerate primers were designed by aligning sequences available in other cyprinid species; letters denote where the sequence may be more than one specific base as follows: M (A or C), R (A or G), S (G or C), K (G or T), W (A or T), Y (C or T). Multiple primers were designed to gain overlapping sequence segments for *cyp2k* and *cyp3a* genes, designated F1, F2, etc. (sense) and R1, R2, etc. (antisense), from which a consensus sequence was established, and carp-specific rt-qPCR primers designed.

## References

- (1) Bickley, L.K., Lange, A., Winter, M.J., Tyler, C.R. Evaluation of a carp primary hepatocytes culture system for screening chemicals for oestrogenic activity. *Aquat Toxicol.* 2009, 94, 195-203
- (2) Thompson, J.D., Higgins, D.G., Gibson, T.J. CLUSTAL W: improving the sensitivity of progressive multiple sequence alignment through sequence weighting, position-specific gap penalties and weight matrix choice. *Nucleic Acids Res.* 1994, 22, 4673-4680
- (3) Rozen, S. and Skaletsky, H. Primer3 on the WWW for general users and for biologist programmers. *Methods Mol Biol.* 2000, 132, 365-86
- (4) Hall, T.A. BioEdit: a user-friendly biological sequence alignment editor and analysis program for Windows 95/98/NT. *Nucl. Acid. S.* 1999, 41, 95-98
